RESEARCH ARTICLE

# Lysosomal Enzyme Glucocerebrosidase Protects against A $\beta$ <sub>1-42</sub> Oligomer-Induced Neurotoxicity

Seulah Choi<sup>1,2,8</sup> , Donghoon Kim<sup>1,2,8</sup> , Tae-In Kam<sup>1,2</sup>, Seungpil Yun<sup>1,2,7</sup>, Sangjune Kim<sup>1,2</sup>, Hyejin Park<sup>1,2</sup>, Heehong Hwang<sup>1</sup>, Olga Pletnikova<sup>6</sup>, Juan C. Troncoso<sup>2,6</sup>, Valina L. Dawson<sup>1,2,3,4,7</sup>, Ted M. Dawson<sup>1,2,4,5,7</sup>, Han Seok Ko<sup>1,2,8\*</sup>

**1** Neuroregeneration and Stem Cell Programs, Institute for Cell Engineering, The Johns Hopkins University School of Medicine, Baltimore, Maryland, United States of America, **2** Department of Neurology, The Johns Hopkins University School of Medicine, Baltimore, Maryland, United States of America, **3** Department of Physiology, The Johns Hopkins University School of Medicine, Baltimore, Maryland, United States of America, **4** Solomon H. Snyder Department of Neuroscience, The Johns Hopkins University School of Medicine, Baltimore, Maryland, United States of America, **5** Department of Pharmacology and Molecular Sciences, The Johns Hopkins University School of Medicine, Baltimore, Maryland, United States of America, **6** Department of Pathology, The Johns Hopkins University School of Medicine, Baltimore, Maryland, United States of America, **7** Adrienne Helis Malvin Medical Research Foundation, New Orleans, Louisiana, United States of America, **8** Diana Helis Henry Medical Research Foundation, New Orleans, Louisiana, United States of America

 These authors contributed equally to this work.

\* [hko3@jhmi.edu](mailto:hko3@jhmi.edu)

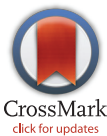

 OPEN ACCESS

**Citation:** Choi S, Kim D, Kam T-I, Yun S, Kim S, Park H, et al. (2015) Lysosomal Enzyme Glucocerebrosidase Protects against A $\beta$ <sub>1-42</sub> Oligomer-Induced Neurotoxicity. PLoS ONE 10(12): e0143854. doi:10.1371/journal.pone.0143854

**Editor:** Kostas Vekrellis, Foundation for Biomedical Research Academy of Athens, GREECE

**Received:** June 12, 2015

**Accepted:** November 10, 2015

**Published:** December 2, 2015

**Copyright:** © 2015 Choi et al. This is an open access article distributed under the terms of the [Creative Commons Attribution License](https://creativecommons.org/licenses/by/4.0/), which permits unrestricted use, distribution, and reproduction in any medium, provided the original author and source are credited.

**Data Availability Statement:** All relevant data are within the paper and its Supporting Information files.

**Funding:** This work was supported by the National Institutes of Health/National Institute of Neurological Disorders and Stroke (NINDS) NS38377 (H.S.K.); the Morris K. Udall Parkinson's Disease Foundation and NS082205 (H.S.K.); the Adrienne Helis Malvin Medical Research Foundation; and the Diana Helis Henry Medical Research Foundation (H.S.K.). The funders had no role in study design, data collection and analysis, decision to publish, or preparation of the manuscript.

## Abstract

Glucocerebrosidase (GCase) functions as a lysosomal enzyme and its mutations are known to be related to many neurodegenerative diseases, including Gaucher's disease (GD), Parkinson's disease (PD), and Dementia with Lewy Bodies (DLB). However, there is little information about the role of GCase in the pathogenesis of Alzheimer's disease (AD). Here we demonstrate that GCase protein levels and enzyme activity are significantly decreased in sporadic AD. Moreover, A $\beta$ <sub>1-42</sub> oligomer treatment results in neuronal cell death that is concomitant with decreased GCase protein levels and enzyme activity, as well as impairment in lysosomal biogenesis and acidification. Importantly, overexpression of GCase promotes the lysosomal degradation of A $\beta$ <sub>1-42</sub> oligomers, restores the lysosomal impairment, and protects against the toxicity in neurons treated with A $\beta$ <sub>1-42</sub> oligomers. Our findings indicate that a deficiency of GCase could be involved in progression of AD pathology and suggest that augmentation of GCase activity may be a potential therapeutic option for the treatment of AD.

## Introduction

The abnormal deposition of aggregated proteins such as amyloid- $\beta$  (A $\beta$ ), tau,  $\alpha$ -synuclein, and TAR DNA-binding protein (TDP-43) are linked to various age-related neurodegenerative disorders [1, 2]. Alzheimer's disease (AD) is the most common age-related neurodegenerative disorder, the pathological hallmark of which is the accumulation of oligomeric A $\beta$  peptides and

**Competing Interests:** The authors have declared that no competing interests exist.

**Abbreviations:** AD, Alzheimer's Disease; DLB, Dementia with Lewy Bodies; TDP43, TAR DNA-binding protein 43; GD, Gaucher's disease; GCase, Glucocerebrosidase; PD, Parkinson's Disease; TFEB, transcription factor EB; UPS, ubiquitin proteasome system; 4-MU, 4-Methylumbelliferyl  $\beta$ -glucopyranoside; DAPI, 4',6-diamidino-2-phenylindole; TUNEL, Terminal deoxynucleotidyl transferase dUTP nick and labeling; LDH, lactate dehydrogenase; CD, cathepsin; LAMP1, lysosomal-associated membrane protein 1; LMP, lysosomal membrane permeabilization; APP, amyloid precursor protein; E-64d, (2S,3S)-trans-Epoxy succinyl-L-leucylamido-3-methylbutane ethyl ester; PepA, pepstatin A; Endo H, endoglycosidase H; CBE, conduritol B epoxide; MOI, multiplicity of infection.

tau species that lead to neuritic plaques and neurofibrillary tangles. Growing evidence suggests that early stages of AD are driven by the oligomerization of A $\beta$ , which plays a critical role in the formation of A $\beta$  deposits in patients with AD [3].

One of the most recognized risk factors of AD is aging. As humans age, degradation mechanisms lose efficiency, resulting in aberrant aggregate levels of numerous types of cellular proteins. It is well documented that diminished proteasomal and autophagic-lysosomal activity may be a major contributor to AD pathology, since malfunctioning degradation systems lead to A $\beta$  peptide accumulation. This may increase the selective vulnerability of neurons and could ultimately have a substantial impact on the disease process [3–6]. The autophagic-lysosomal system is one of the main cellular pathways that promote A $\beta$  degradation [7, 8]. Therefore, recent therapeutic strategies have focused on enhancing autophagy-lysosome-mediated degradation of A $\beta$  as a treatment for AD [9, 10].

Glucocerebrosidase (GCase) is a lysosomal enzyme that catalyzes the breakdown of glucosylceramide to glucose and ceramide. *GBA1* deficient mutants have been associated with several neurodegenerative disorders. Homozygous mutations in the *GBA1* gene are associated with Gaucher's disease (GD), a lysosomal storage disorder [11, 12]. In addition, heterozygous mutations in *GBA1* are significant genetic risk factors in the progression of Parkinson's disease (PD) [13–15] and Dementia with Lewy bodies (DLB) [16–18]. While the precise molecular mechanisms by which *GBA1* mutations contribute to these diseases are still not known, much evidence indicates that *GBA1* mutations in selectively vulnerable neurons lead to a reduction in GCase protein levels and activity. Accompanying these changes in GCase in PD and DLB is the accumulation of  $\alpha$ -synuclein and glucosylceramide, as well as autophagic-lysosomal defects [19–22]. GCase protein levels and activity are considerably lower in the substantia nigra of the PD post-mortem brain even without the *GBA1* mutations [22–24], and the accumulation of  $\alpha$ -synuclein leads to a substantial reduction of GCase levels and activity [19, 22]. Additionally, the GCase deficit influences the rate of cell-to-cell spreading of  $\alpha$ -synuclein amyloids, suggesting that the lysosomal function of GCase may be a key modulator of the disease process [25]. On the other hand, the enhancement of GCase activity via gene therapy or pharmacological chaperones that target GCase yields beneficial effects on the neurodegeneration phenotype observed in PD and  $\alpha$ -synucleinopathy *in vivo* [26, 27]. However, there is little information about GCase deficiency and its potential contribution to AD pathogenesis. Given that lysosomal function is also critical to disease development of AD and is involved in the accumulation of A $\beta$ , it is reasonable to presume that GCase overexpression may lead to enhancement of GCase activity that could ameliorate the disease process.

To investigate the potential relationship between AD pathology and lysosomal dysfunction caused by GCase deficiency, we sought to explore whether there are aberrant GCase protein levels and activity in brains affected by AD. Moreover, we assessed whether the enhancement of GCase levels and activity could accelerate the lysosomal degradation of A $\beta_{1-42}$  oligomers and ameliorate A $\beta_{1-42}$  oligomer-induced neuronal toxicity. In this study, we demonstrate that there was a substantial decrease in GCase protein levels and enzyme activity in post-mortem hippocampal brain tissue of AD patients and A $\beta_{1-42}$  oligomer-treated primary neurons. We also found that augmentation through the ectopic expression of GCase protects against A $\beta_{1-42}$ -induced neuronal toxicity.

## Materials and Methods

### Ethics statement

For use of human post-mortem brain tissues in this research, patients provided written informed consent and approval for the consent procedure and research were obtained from the

Johns Hopkins Institutional Review Boards (Approval No. NA00032761). Human post-mortem brain tissues were obtained through the brain donation program of the Alzheimer's Disease Research Center (<http://www.alzresearch.org>) and the Morris K. Udall Parkinson's Disease Research Center of Excellence at Johns Hopkins Medical Institutions (JHMI) in compliance with local Institutional Review Board and HIPAA (Health Insurance Portability and Accountability Act) regulations.

### Preparation of synthetic A $\beta$ <sub>1–42</sub> oligomers

The synthetic A $\beta$ <sub>1–42</sub> peptide was purchased from rPeptide (Cat#: A-1163-2). 2.2 mM A $\beta$ <sub>1–42</sub> peptides solution was obtained by dissolving the peptides in DMSO, and then further diluted in PBS to obtain a 250  $\mu$ M stock solution. Cross-linking of the peptides occurred while the solution was incubated at 4°C for at least 24 hours. After cross-linking, the solution was aliquoted and stored at -80°C until use. Before usage, the solution was centrifuged at 12,000 X g for 10 minutes to remove the fibril forms of A $\beta$ <sub>1–42</sub>, which would precipitate. Then, the dissolved oligomeric A $\beta$ <sub>1–42</sub> that was present in the supernatant was used for experiments. The A $\beta$ <sub>1–42</sub> preparation was confirmed by immunoblot using anti-A $\beta$  antibody (Covance, clone: 4G8) [28].

### Primary neuronal cultures

Hippocampal and cortical neurons were prepared from embryonic day 15 CD-1 mice (Charles River, Wilmington, MA), as previously described [28, 29]. Dissociated neurons were plated onto dishes coated with poly-D-lysine (Sigma-Aldrich) while submerged in the culture medium that consisted of Neurobasal Media (Invitrogen), containing B27 supplement and L-glutamine (Gibco). The medium was changed twice a week and the cultures were maintained in 7% CO<sub>2</sub> incubator at 37°C. 5 days after the culture, 30  $\mu$ M 5-fluoro-2'-deoxyuridine was added to the cultures to inhibit glial cell growth. All procedures involving mice were approved by and conformed to the guidelines of the Johns Hopkins University Animal Care and Use Committee.

### Production of lenti-viral vector and virus, and treatment of lenti-virus

For preparation of GCase lenti-virus, human complementary DNA of *GBA1* was subcloned into a lenti-viral cFUGW vector by enzyme Age I, and the positive clone was sequenced. Lenti-viruses were prepared as previously described [30]. Briefly, the cFUGW-*GBA1* plasmid or cFUGW plasmid was transiently transfected into HEK293FT along with viral packaging plasmids purchased from Invitrogen using lipofectamine LTX with plus transfection reagent. Infectious lenti-viruses were harvested at 48 hours post-transfection. The supernatant was collected, filtered, concentrated by ultracentrifugation at 25,000 X g for 3 hours, re-suspended in 1% BSA in PBS, and then stored at -80°C until use. Viral particle content was assayed for the p24 core antigen by using the p24 antigen enzyme-linked immunosorbent assay (RETROtek, 22-157-319) according to the manufacturer's instructions. Titer was measured using the Lenti-X™ qRT-PCR titration kit (Clontech) according to the manufacturer's instructions. Lenti-cFUGW-GCase or lenti-cFUGW virus was used to overexpress GCase or control with a multiplicity of infection (MOI) of 5 in primary neurons at 7 days *in vitro*.

### Immunoblot analysis

Human hippocampal post-mortem tissues or mouse cortical neurons were homogenized and prepared in lysis buffer {for tissues, 10 mM Tris-HCl, pH 7.4, 150 mM NaCl, 5 mM EDTA,

0.5% Nonidet P-40, 10 mM Na- $\beta$ -glycerophosphate, phosphatase inhibitor cocktail I and II (Sigma-Aldrich), and complete protease inhibitor cocktail (Roche); for mouse cortical neurons, 50 mM Tris-HCl, 150 mM NaCl, 1% NP-40, 0.5% sodiumdeoxycholate, 1 mM EDTA, 1% SDS, and protease inhibitor as previously described [31, 32]. For subcellular fractionation of primary cultured neurons, the buffer containing 0.25 M sucrose, 10 mM HEPES (pH 7.4) and 0.1 M EDTA was used to lyse the cells. The lysate is then homogenized and centrifuged at 6,800 X g, 4°C, for 5 minutes. The supernatant was further centrifuged at 17,000 X g for 10 min, and the pellet enriched with lysosomes was harvested in the lysis buffer described above. 2X Laemmli buffer (Bio-Rad) was utilized to dilute the lysates. Electrophoresis on 8–16% and 4–20% gradient SDS-PAGE gels (Life technologies) was performed in order to resolve proteins from the human hippocampal post-mortem tissue (20  $\mu$ g) and proteins from the mouse cortical neuron (10  $\mu$ g) respectively. The proteins were then transferred to nitrocellulose membranes. The membranes were blocked with Tris-buffered saline (5% non-fat dry milk and 0.1% Tween-20) for 1 hour and incubated at 4°C overnight with primary antibodies: anti-GCase (1:1000, G4171, Sigma), anti-Amyloid (1:1000, clone: 4G8, BioLegend), anti-cathepsin D (1:2000, ab6313, Abcam), MEK1/2 (1:1000, #8727, Cell Signaling Technology) or anti-LAMP1 (1:1000, ab24170, Abcam) antibodies, followed by HRP-conjugated rabbit or mouse secondary antibodies (GE Healthcare) for 1 hour at room temperature. Chemiluminescence (Thermo Scientific) was utilized in order to visualize the immunoblot signals. The membranes were re-probed with HRP-conjugated  $\beta$ -actin antibody (1:30,000, Sigma). For lysosome enzyme inhibition, E-64d and Pepstatin A (PepA) were purchased from Sigma-Aldrich.

### Glucocerebrosidase activity assay

The GCase activity assay has been performed as described [19, 33]. Human hippocampal post-mortem tissues and primary cultured neuron samples were gathered in the buffer containing 0.25 M sucrose, 10 mM HEPES (pH 7.4) and 0.1 M EDTA, and the samples were homogenized and centrifuged at 6,800 X g, 4°C, for 5 minutes. The supernatant was then centrifuged at 17,000 X g for 10 min, and the pellet enriched with lysosomes was harvested in 50  $\mu$ l of activity assay buffer (0.25% Triton X-100 (Sigma-Aldrich), 0.25% Taurocholic acid (Sigma-Aldrich), 1 mM EDTA, in citrate/phosphate buffer, pH 5.4). The samples were then frozen and thawed twice, and iced for 30 minutes. 10  $\mu$ l of supernatant was obtained after the samples were centrifuged at 20,000 X g for 20 minutes, which was then used to measure GCase activity in 50  $\mu$ l of 1% BSA, with 1 mM 4-Methylumbelliferyl  $\beta$ -glucopyranoside (4-MU; M3633, Sigma-Aldrich) and/or 10 mM conduritol B epoxide (CBE, Sigma-Aldrich). The reaction was further incubated for 40 minutes at 37°C, and 50  $\mu$ l (equi-volume) of 1M glycine at pH of 12.5 was added to halt the reaction. 100  $\mu$ l samples were prepared for fluorescence testing (Nunc, # 136101), which was measured via a Perkin Elmer plate reader (ex = 355 nm, em = 460 nm, 0.1 s). GCase1 activity was obtained by subtracting the GCase activity in presence of CBE from the total GCase activity of each sample. 95–97% of GCase activities were reduced by CBE treatment. Fluorescence intensity was converted to actual enzyme activities using a 4-MU standard curve by human recombinant GCase (7410-GH, R&D systems).

### $\beta$ -galactosidase activity assay

The pellet enriched with lysosomes was harvested as described above in Glucocerebrosidase activity assay.  $\beta$ -galactosidase activity in lysosome-enriched fraction was determined with the  $\beta$ -Gal Assay kit (Life technologies, #K1455-01) according to the manufacturer's instructions.

## Endoglycosidase H resistant assay

As previously described [19], Triton-X100 soluble lysates (25  $\mu$ g) were denatured in 10  $\mu$ l of Glycoprotein Denaturing Buffer and digested with 500 U of Endo H (New England Biolabs) for 1 hour at 37°C. Control reactions were incubated in the same condition without Endo H enzyme.

## Cell viability analysis

Cell viability was tested via two methods; The DeadEnd<sup>TM</sup> Fluorometric TUNEL system (Promega) and LDH assay (Sigma). Cell death was assessed through the TUNEL assay, according to the manufacturer's protocol. Nuclei were stained with Hoechst (Life technologies). LDH activity in culture medium, representing relative cell viability and membrane integrity, was measured by spectrophotometer using the LDH assay kit, following the manufacturer's instructions.

## Real-time PCR

Using RNeasy<sup>®</sup> Plus Micro Kit (Qiagen), total RNA contents were isolated from human hippocampal post-mortem tissues. SuperScript<sup>®</sup> IV First-Strand Synthesis System (Life technologies) was used to synthesize the first-stand cDNA. Real-time PCR was conducted with the SYBR Green reagent and a ViiA<sup>™</sup> 7 real-time PCR system (Life technologies). According to the  $2^{-\Delta\Delta CT}$  method [34], all  $\Delta C_T$  values were normalized to  $\beta$ -actin. The primer sequences used for real-time PCR were as flows: human  $\beta$ -actin forward, 5'-ATT GCC GAC AGG ATG CAG AAG-3'; human  $\beta$ -actin reverse, 5'-TTG CTG ATC CAC ATC TGC TGG-3'; human *GBA1* forward, 5'-CAG CCT CAC AGG ATT GCT TCT-3'; human *GBA1* reverse, 5'-GAC ACA CAC CAC CGA GCT GTA-3'.

## Immunofluorescence

Coverslips with poly-D-lysine coating were utilized in order to plate the primary mouse cortical neurons at a concentration of 20,000 cells/cm<sup>2</sup>. 4% paraformaldehyde was used to fix the neurons, followed by blocking in a solution with 5% normal donkey serum (Jackson ImmunoResearch, BarHarbor, ME), 2% BSA (Sigma) and 0.1% Triton X-100 (Sigma) for 1 hour at room temperature. A series of incubations with anti-LAMP1 (1:1,000, Abcam) and anti-cathepsin D (1:1,000, Abcam) antibodies or anti-LAMP1 (1:1,000, Abcam) and anti-MAP2 (1:1000, MAB3418, Millipore) antibodies followed at 4°C overnight. The samples were washed with 0.1% Triton X-100 in PBS, followed by 1 hour of incubation of the coverslips with a mixture of FITC-conjugated (Jackson Immunoresearch) and Cy3-conjugated (Jackson Immunoresearch) secondary antibodies at room temperature. The fluorescent images were acquired via a Zeiss confocal microscope (Zeiss Confocal LSM 710) after the coverslips were mounted on microscope slides

## Quantification of lysosomal area and size

Primary mouse cortical neurons were plated onto 18 mm coverslips coated with poly-D-lysine in a 12-well plate ( $1 \times 10^5$  cells/coverslip). After 7 days *in vitro*, neurons were infected with control or GCase lenti-viral vector (MOI = 5) for 72 hours and then incubated with 1  $\mu$ M oligomeric A $\beta_{1-42}$  and CellLight<sup>®</sup> plasma membrane-CFP (C10606; Life technologies) for 24 hours. For measuring of lysosomal area and size, the lysosomes were stained with LysoTracker Red DND-99 (L7528; Life technologies) following the manufacturer's instructions. The areas of positive-LysoTracker and diameters of puncta were measured using ImageJ software in at

least 15 randomly selected non-overlapping images per each group. Each image contained 3–4 cells.

### Cytosolic pH measurement

For intracellular pH measurement, primary cortical neurons were incubated with 10  $\mu\text{M}$  of pHrodo™ Green and Red AM intracellular pH indicators for 30 minutes at 37°C according to the manufacturer's protocol (P35380; Life technologies). Standard curves of cytosolic pH were created using pHrodo™ Green and Red AM with intracellular pH calibration buffer kit (P35379; Life technologies) that contains a pH range of (pH 4.5, 5.5, 6.5, and 7.5), as well as valinomycin and nigericin, which helps equilibrate the pH inside and outside of cells. The fluorescence images were obtained using a confocal microscope (Zeiss Confocal LSM 710) and the intensities were analyzed using ImageJ (NIH, <http://rsb.info.nih.gov/ij/>).

### Cathepsin D activity assay

Lysosome-enriched fraction and cytoplasmic fraction were prepared as described above in glucocerebrosidase activity assay. The lysosome-enriched fraction was obtained from the pellet after centrifugation at 17,000 X g for 10 minutes, and the supernatant was used as the cytoplasmic fraction. Equal amounts of protein (15  $\mu\text{g}$ ) were used for the cathepsin D activity assay. Fluorescence values of these samples were measured using cathepsin D Activity Assay Kit/Fluorometric (Abcam, ab65302), following the manufacturer's protocol. The actual enzyme activities were then calculated using a standard curve of the substrate by cathepsin D (C3138, Sigma).

### Statistics

Data were presented as mean  $\pm$  SEM from at least 3 independent experiments. In order to assess statistical significance, Student's t tests or ANOVA tests followed by Bonferroni post hoc analysis were performed using GraphPad Prism software. Assessments with a  $p < 0.05$  were considered significant.

## Results

### GCCase protein levels and enzyme activity are decreased in sporadic AD and A $\beta_{1-42}$ oligomer-treated neurons

To evaluate the potential relationship between GCCase deficiency and AD pathogenesis, we monitored GCCase protein levels and enzyme activity in human post-mortem tissue of AD patients and age-matched controls (S1 Table). Whole tissue lysates were prepared from human AD post-mortem hippocampus brain tissues, followed by immunoblot analysis. In hippocampal AD patient samples, there is a 58% reduction in GCCase protein levels when compared to the controls (Fig 1A and 1B). Accompanying the reduction of GCCase proteins, there is also a 37% reduction of GCCase enzyme activity in hippocampal lysosome-enriched samples from AD patients over the age-matched controls (Fig 1C). Interestingly, the activity of other lysosomal hydrolase enzymes, such as  $\beta$ -galactosidase, is also reduced in AD patients' brain samples when compared to the controls (S1A Fig). To verify whether alterations in GCCase glycosylation patterns lead to lower protein levels and lysosomal activity of GCCase seen in AD post-mortem samples, the levels of mature lysosomal GCCase were analyzed by Endo H treatment. This analysis reveals no change in the levels of Endo H-resistant GCCase in AD hippocampus compared to the control hippocampus, indicating that the lowered protein levels and lysosomal GCCase function in AD are unlikely due to an abnormal trafficking of GCCase (S1B Fig). To ascertain

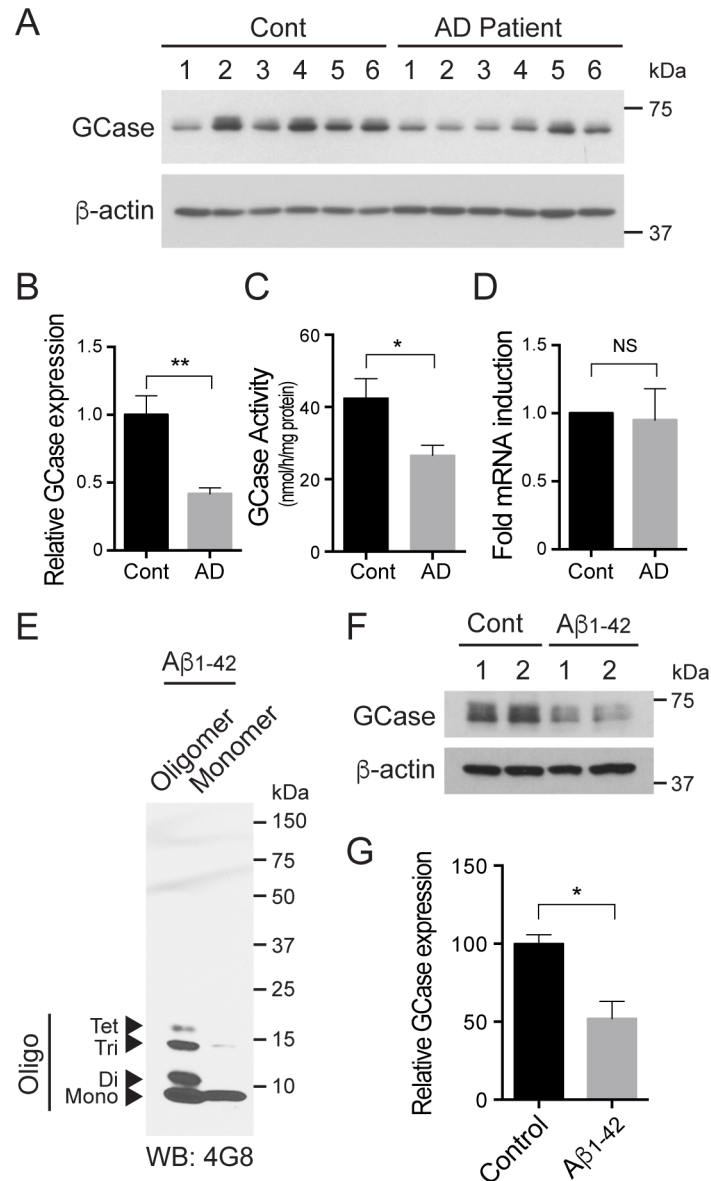

**Fig 1. GCase protein levels and activity are reduced in sporadic AD brain tissues and Aβ<sub>1-42</sub> oligomer-treated primary neurons.** (A and B) GCase expression was decreased in the hippocampal region of brains affected by Alzheimer's disease (n = 6), as opposed to controls (n = 6). GCase expression levels were normalized to β-actin and quantified. (C) The GCase enzymatic activities were measured using lysosome-enriched fractions for the brains affected by Alzheimer's disease and the controls (n = 6 per group). (D) Expression of *GBA1* gene was determined in AD hippocampal regions compared to the controls using real-time PCR. The β-actin mRNA was used as an internal reference control to normalize relative mRNA levels (n = 6 per group). (E) Oligomeric and monomeric Aβ<sub>1-42</sub> were identified by SDS-PAGE using anti-Aβ antibody (4G8). (F) Primary cortical neurons were incubated with 1 μM oligomeric Aβ<sub>1-42</sub> for 24 h at 10 days *in vitro*. The cell lysates were subjected to immunoblot using GCase and β-actin antibodies. (G) The expression level of GCase was quantified. Data are expressed as the mean ± SEM (Student's t test, \*P < 0.05, \*\*P < 0.01).

doi:10.1371/journal.pone.0143854.g001

whether the reduction of GCase is caused by the alteration in *GBA1* mRNA levels, real-time PCR was performed. This reveals no difference in the mRNA levels of GCase between the AD and control samples (Fig 1D), indicating that the reduction of GCase protein levels and activity

is possibly due to their abnormal protein turn over. Given that  $A\beta_{1-42}$  oligomer treatment recapitulates the phenotype found in AD [35], we asked whether the treatment of  $A\beta_{1-42}$  oligomers could lead to decrements of GCase protein levels and enzyme activity. Oligomeric species of  $A\beta_{1-42}$  were prepared, and the toxic oligomeric species and non-fibril particles were confirmed by immunoblot analysis (Fig 1E) [28]. To ascertain whether the prepared  $A\beta_{1-42}$  oligomers could lead to decreased GCase protein levels and activity, we treated primary cortical neurons with  $A\beta_{1-42}$  oligomers (1  $\mu$ M) and performed an immunoblot analysis. Consistent with the results from the human AD post-mortem hippocampus brain tissue, there are a 48% reduction in GCase protein levels (Fig 1F and 1G) and a 79% decrease in GCase enzyme activity (Fig 2C). Taken together, these data indicate that GCase deficiency as indicated by reduced GCase protein expression and enzyme activity, in part, may be a contributor to the progression of AD pathogenesis.

### GCase protects against $A\beta_{1-42}$ oligomer-induced neuronal cell death

Our findings of reduced GCase protein levels and activity in AD brain samples and  $A\beta_{1-42}$  oligomer-treated primary neurons prompted us to examine the potential neuroprotective role of GCase in  $A\beta_{1-42}$  oligomer-induced toxicity. Primary hippocampal or cortical neurons at 7 days *in vitro* were infected with either lenti-control or lenti-GCase virus, and treated with  $A\beta_{1-42}$  oligomers at 10 days *in vitro* for 48 hours. Overexpression of GCase leads to a 245% increase in GCase protein levels and a 480% increase in GCase activity (Fig 2A, 2B and 2C). Neuronal death in response to  $A\beta_{1-42}$  toxicity was monitored through TUNEL staining and LDH measurement. The overexpression of GCase significantly reduces the  $A\beta_{1-42}$  oligomer-induced toxicity in primary hippocampal neurons by 80% and 57% when observed through the TUNEL staining and the LDH assay, respectively (Fig 2D, 2E and 2F). Similar results were observed in primary cortical neurons through the LDH assay (Fig 2G). These data indicate that increased GCase expression rescues  $A\beta_{1-42}$  oligomer-induced neuronal cell death.

### GCase accelerates $A\beta_{1-42}$ oligomer degradation

Since GCase localizes in the lysosome compartment and  $A\beta$  oligomers are degraded through the lysosomal degradation pathway [7, 8, 36], we investigated whether GCase overexpression can regulate  $A\beta$  oligomer degradation. Primary cortical neurons were infected with either lenti-control or lenti-GCase virus, and subjected to  $A\beta_{1-42}$  treatment.  $A\beta$  immunoblot analysis revealed that ectopic expression of GCase dramatically decreases  $A\beta_{1-42}$  oligomer levels, indicating that overexpression of GCase promotes intra-lysosomal degradation of  $A\beta_{1-42}$  oligomers by increasing lysosomal GCase activity (Fig 3A and 3B). In addition, there are approximately two- to three-fold increased levels of  $A\beta_{1-42}$  oligomers when treated with the lysosomal enzyme inhibitors, E-64d+PepA. This indicates that the clearance of  $A\beta_{1-42}$  oligomers is regulated by the autophagic-lysosomal system. These accumulations of  $A\beta_{1-42}$  oligomers are again reduced by the overexpression of GCase (Fig 3A and 3B). These data suggest that GCase regulates  $A\beta_{1-42}$  oligomer levels, which potentially protects against  $A\beta_{1-42}$  oligomer-induced neuronal toxicity.

### GCase alleviates $A\beta_{1-42}$ oligomer-induced lysosomal impairment

$A\beta_{1-42}$  oligomer-induced neurotoxicity is due to lysosomal dysfunctions involving impaired lysosomal biogenesis, acidification and reduced cathepsin D activity in the lysosome [37, 38]. Therefore, we investigated whether overexpression of GCase restores these  $A\beta_{1-42}$  oligomer-induced lysosomal dysfunctions. Using imageJ software, lysosomal area was assessed via quantifying the LysoTracker positive puncta, and the lysosomal size was calculated via the diameter



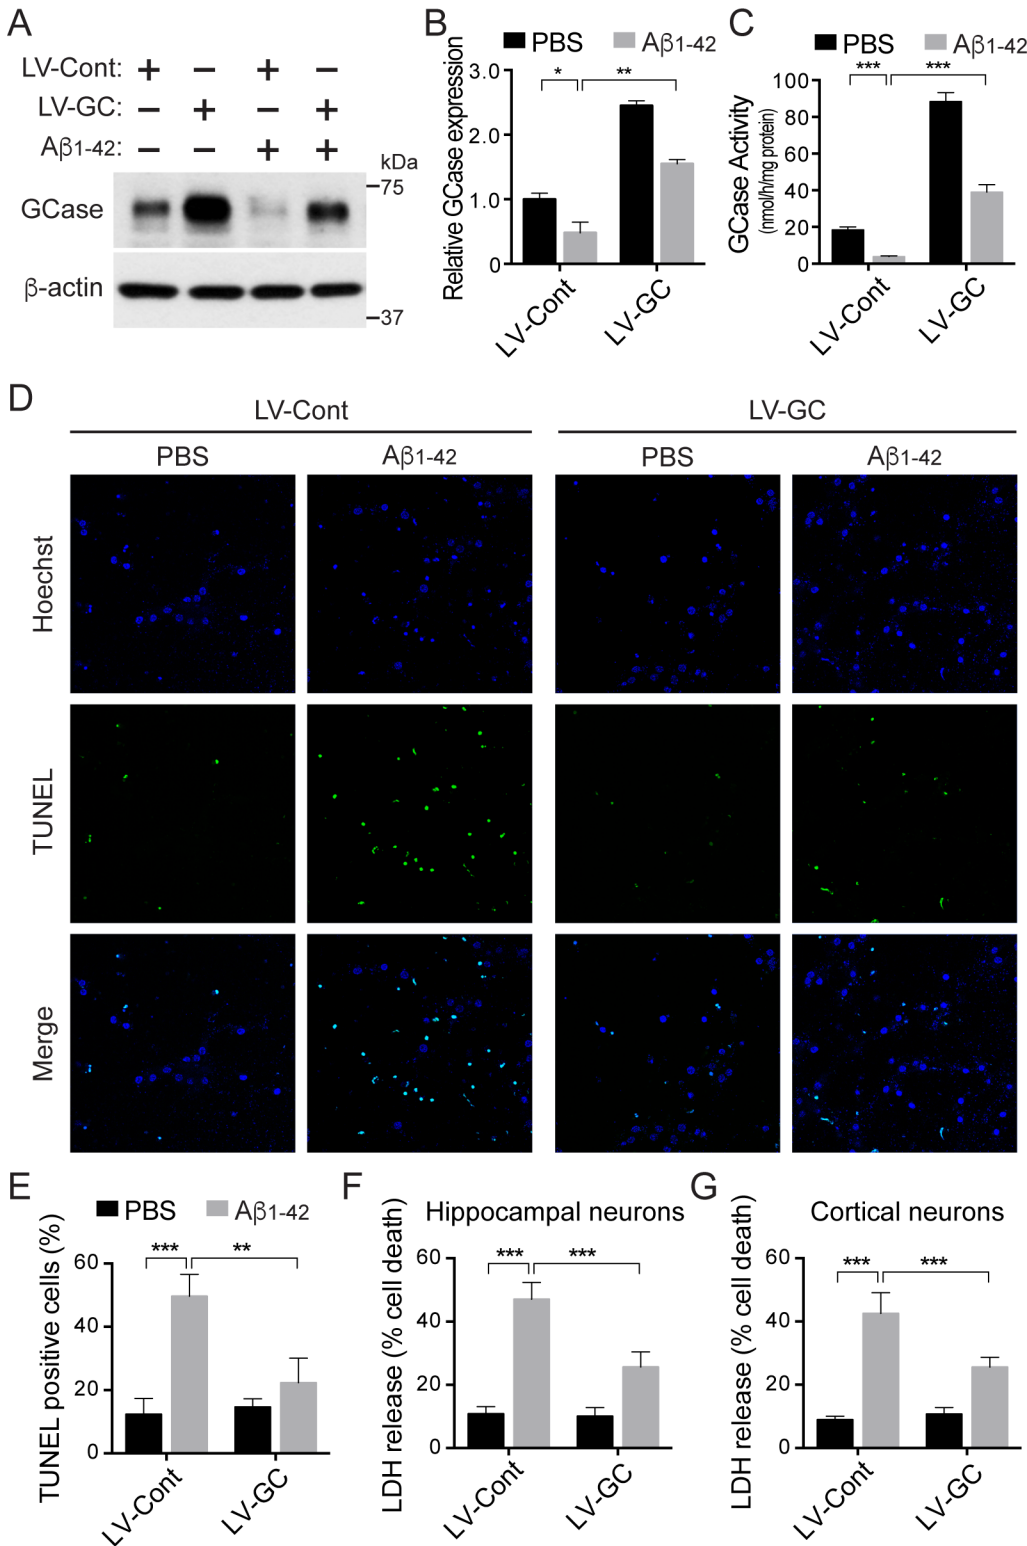

**Fig 2. GCase protects against Aβ<sub>1-42</sub> oligomer-induced neuronal cell death.** (A, B and C) Primary mouse hippocampal neurons expressing lenti-control (LV-Cont, n = 3–4 per group) or lenti-GCase (LV-GC, n = 3–4 per group) were treated with 5 μM oligomeric Aβ<sub>1-42</sub> or PBS for 48 h at 10 days *in vitro*, and subjected to immunoblot analysis with anti-GCase antibody and to GCase enzyme activity assay. (D and E) The neuronal cell death was determined by the quantification of TUNEL positive-cells (n = 3–4 per group). Primary mouse hippocampal (F) or cortical (G) neurons were infected with lenti-control or lenti-GCase at 7 days *in vitro*, and then further incubated with 5 μM oligomeric Aβ<sub>1-42</sub> or PBS for 48 h at 10 days *in vitro*. The cell death was assessed via LDH

assay. Data represent the mean  $\pm$  SEM (two-way ANOVA, Bonferroni posttest,  $P^* < 0.05$ ,  $P^{**} < 0.01$ ,  $P^{***} < 0.001$ ,  $n = 5$  for hippocampal neurons,  $n = 6$  for cortical neurons).

doi:10.1371/journal.pone.0143854.g002

of the LysoTracker positive puncta area within each cell. LysoTracker positive puncta area per cell is reduced by 59% following treatment of cortical neurons with  $A\beta_{1-42}$  oligomers. Notably, GCase overexpression restores lysosomal area to 72% of the control neurons (Fig 4A and 4B). The reduced lysosome size observed in primary cortical neurons treated with  $A\beta_{1-42}$  oligomers is also restored by overexpression of GCase (Fig 4C). Similar results in lysosomal sizes and structures shown in Fig 4A using LysoTracker are observed in the primary neurons stained with a lysosome marker, LAMP1 (S2 Fig).

Since several studies suggest that lysosomal dysfunction leads to decreased cytosolic pH levels [39, 40], we asked whether  $A\beta_{1-42}$  oligomer treatment influences the acidification of the cytosol in cortical neurons. Assessment of cytosolic pH was determined by the intensity of fluorescence of pHrodo Red or pHrodo Green AM fluorogenic dye in cortical neurons treated with  $A\beta_{1-42}$  oligomers or PBS. We observed that the fluorescence of both indicators increases as pH decreases (Fig 5A).  $A\beta_{1-42}$  oligomer treatment lowers cytosolic pH from  $pH 7.5 \pm 0.1$  to  $6.7 \pm 0.2$  (Fig 5E), suggesting that lysosomal dysfunction is present. Remarkably, overexpression of GCase restores the lowered cytosolic pH induced by  $A\beta_{1-42}$  oligomer treatment to  $pH 7.2 \pm 0.1$  in cortical neurons (Fig 5B, 5C, 5D and 5E). Taken together, these findings indicate that the protective effect of GCase overexpression may be based on the restoration of impaired lysosomal function induced by  $A\beta_{1-42}$  oligomers.

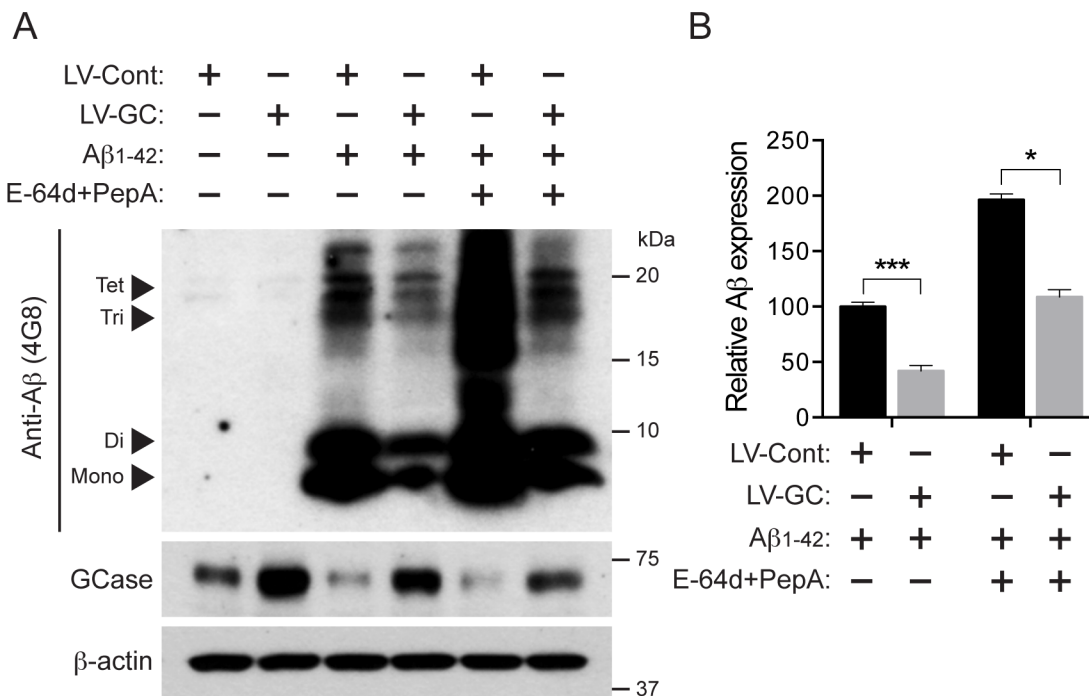

**Fig 3. GCase promotes  $A\beta_{1-42}$  oligomer degradation.** (A) Primary cultured mouse cortical neurons were infected with lenti-control (LV-Cont,  $n = 3$ ) or lenti-GCase (LV-GC,  $n = 3$ ) virus at 7 days *in vitro*, and  $5 \mu M$  oligomeric  $A\beta_{1-42}$  or PBS was added for 48 h at 10 days *in vitro*.  $10 \mu g/ml$  of E-64d and  $10 \mu g/ml$  of PepA were treated 4 h before the treatment of  $A\beta_{1-42}$  oligomers. The monomeric and oligomeric  $A\beta$  expressions were measured with anti- $A\beta$  antibody (4G8) 24 h after the treatment of oligomeric  $A\beta_{1-42}$ . (B) The quantification of  $A\beta$  levels is shown (Student's t test,  $P^* < 0.05$ ,  $P^{***} < 0.001$ ).

doi:10.1371/journal.pone.0143854.g003

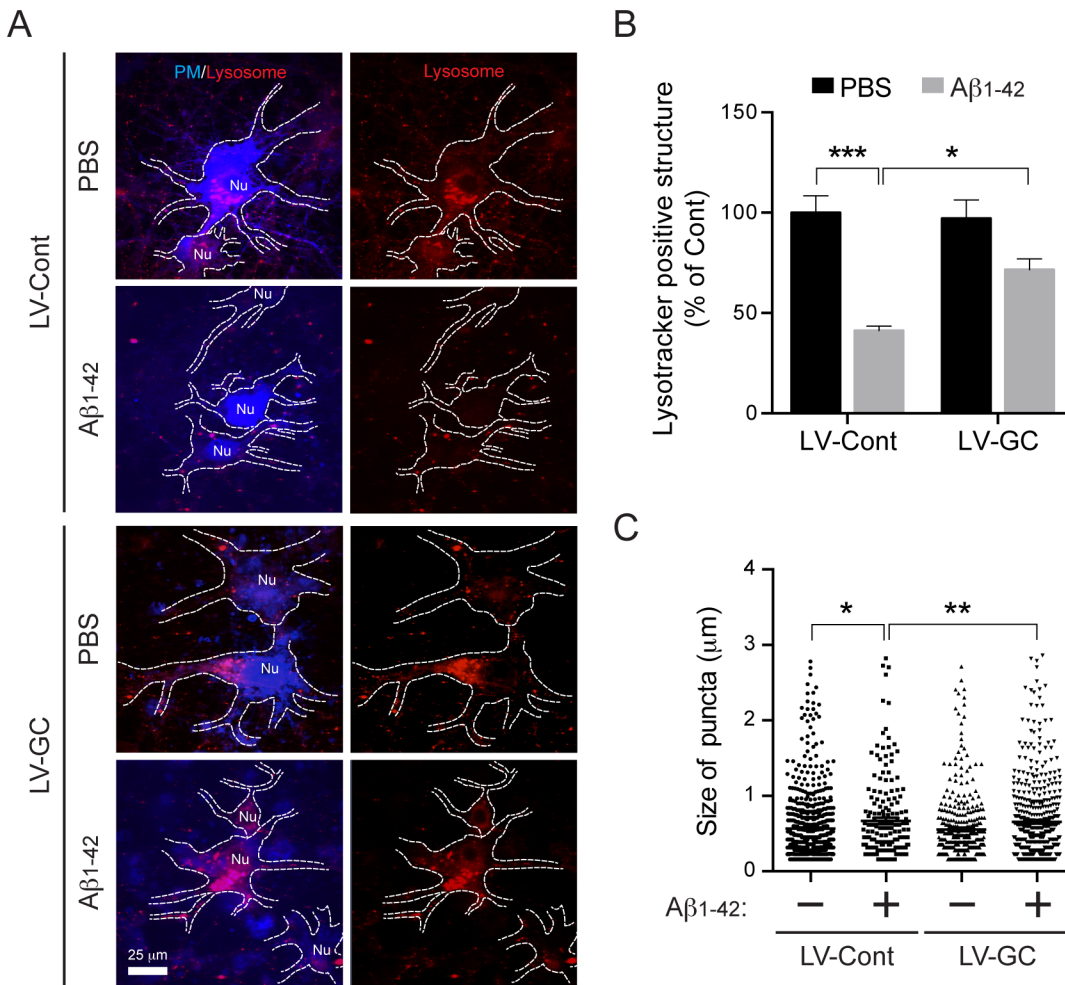

**Fig 4. Overexpression of GCase restores impairment of lysosomal biogenesis induced by Aβ<sub>1-42</sub> oligomers in neurons.** (A) Primary mouse cortical neurons were infected with lenti-control (LV-Cont, n = 3) or lenti-GCase (LV-GC, n = 3) virus at 7 days *in vitro*. 72 h after the infection, the cells were further incubated with PBS or 1 μM oligomeric Aβ<sub>1-42</sub> for 24 h. The plasma membranes were labeled with CellLight plasma membrane-CFP (PM, blue) and the lysosomes were labeled with LysoTracker Red DND-99 (Lysosome, red). (B) The relative area of lysosomes in plasma membrane (dotted outline) was measured (two-way ANOVA, Bonferroni posttest,  $P^* < 0.05$ ,  $P^{***} < 0.001$ ). (C) The diameters of LysoTracker positive-puncta were quantified and represented as a scatter plot (two-way ANOVA, Bonferroni posttest,  $*P < 0.05$ ,  $**P < 0.01$ ) versus control (LV-Cont, PBS).

doi:10.1371/journal.pone.0143854.g004

Next, we monitored the lysosomal activity of cathepsin D, a main lysosomal enzyme. Consistent with previous studies [37, 38], there is a change in the localization of cathepsin D from the lysosome to the cytosol upon treatment with Aβ<sub>1-42</sub> oligomers. In Aβ<sub>1-42</sub> oligomer-treated neurons, there is reduced overlap of cathepsin D and LAMP1, suggesting a decrease in the level of lysosomal cathepsin D. When GCase levels were increased, the overlap of cathepsin D and LAMP1 increases to levels similar to those seen in the control (Fig 6A). Moreover, the cathepsin D activity in the lysosomal fraction prepared from primary neurons treated with Aβ<sub>1-42</sub> oligomers is reduced by 47%. Notably, overexpression of GCase restores the reduction of lysosomal cathepsin D activity in lysosomes by 79% in the cortical neurons treated with Aβ<sub>1-42</sub> oligomers (Fig 6B). There is no significant reduction of cytosolic cathepsin D activity upon treatment with Aβ<sub>1-42</sub> oligomers in the cytosolic fraction (Fig 6B). The reduction of cathepsin D activity was further examined by immunoblot analysis with cytoplasmic and lysosome-enriched fractions. This reveals decreased levels of cathepsin D protein expression in the

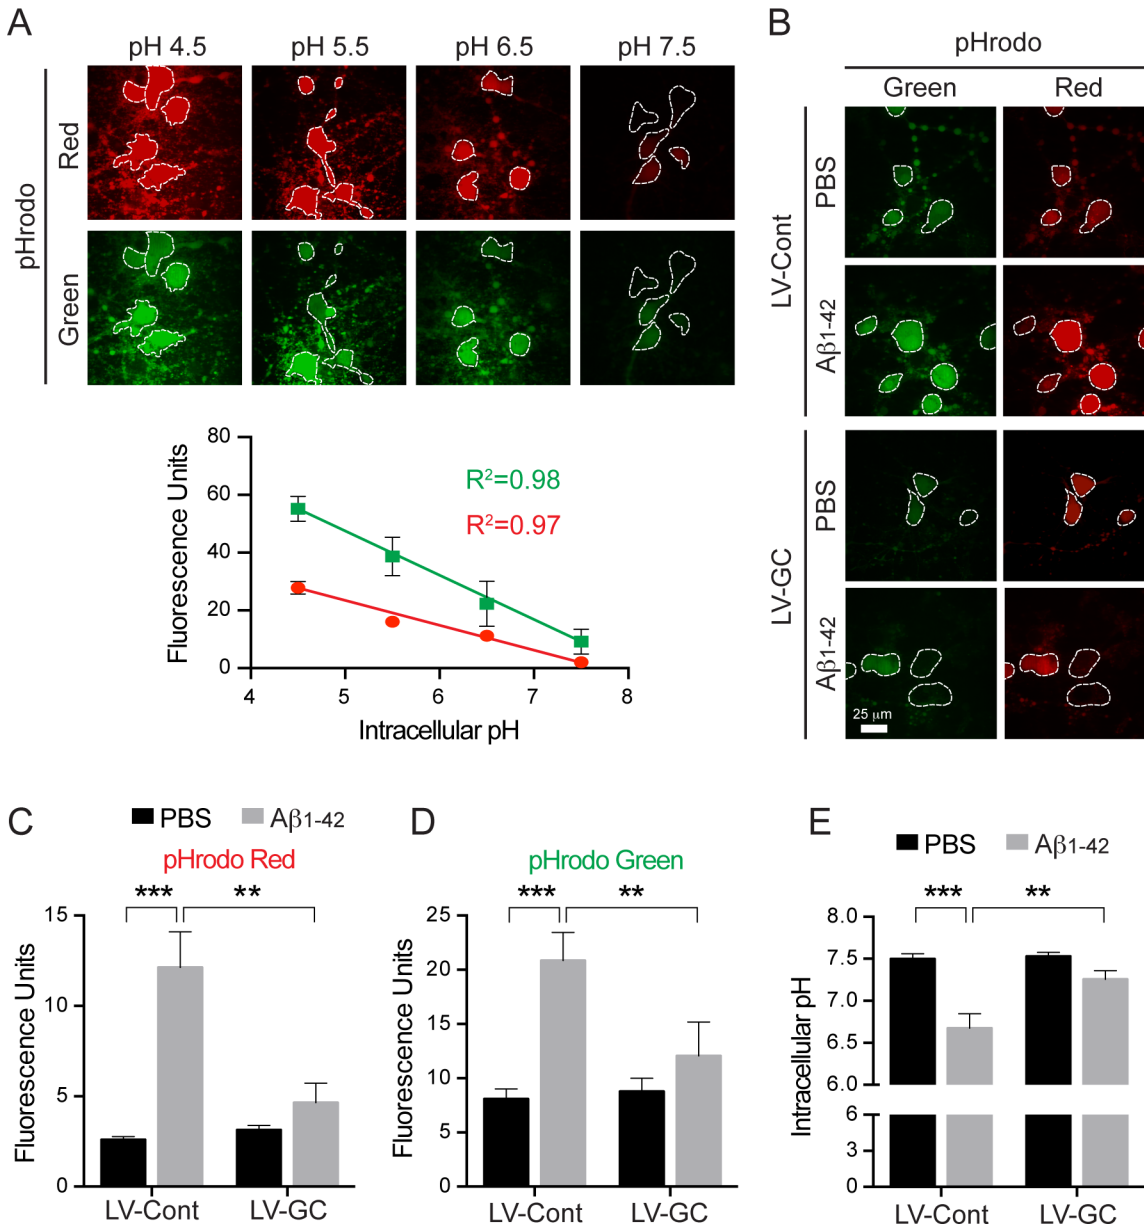

**Fig 5. Overexpression of GCase increases intracellular pH levels reduced by Aβ<sub>1-42</sub> oligomers in primary neurons.** (A) Primary mouse cortical neurons were incubated with pHrodo™ Red or pHrodo™ Green at 37°C for 30 minutes. The fluorescence intensities in the intracellular area (dotted outline) were measured using various pH ranges (4.5, 5.5, 6.5, and 7.5) of intracellular pH calibration buffers. The fluorescence units of pHrodo™ Red and pHrodo™ Green signals are represented as a standard curve. (B) Primary mouse cortical neurons infected with lenti-control (LV-Cont, n = 3) or lenti-GCase (LV-GC, n = 3) virus at 7 days *in vitro* were incubated with PBS or 1 μM oligomeric Aβ<sub>1-42</sub> for 24 h at 10 days *in vitro*. The neurons were loaded with pHrodo™ Red and pHrodo™ Green and live cell imaging solution, and further incubated at 37°C for 30 minutes. (C and D) The fluorescence units were quantified and represented as a graph. (E) The fluorescence units of pHrodo™ Green were converted to pH and represented as a graph (two-way ANOVA, Bonferroni posttest, \*\**P* < 0.01, \*\*\**P* < 0.001).

doi:10.1371/journal.pone.0143854.g005

lysosome when Aβ<sub>1-42</sub> oligomers are treated, whereas the ectopic expression of GCase restored cathepsin D protein levels to the levels comparable with the group untreated with Aβ<sub>1-42</sub> oligomers. Additionally, cytoplasmic cathepsin D levels were examined. No significant difference is found among the different groups (Fig 6C). These results indicate that GCase expression rescues Aβ<sub>1-42</sub> oligomer-induced lysosomal impairment including the decreased number and size

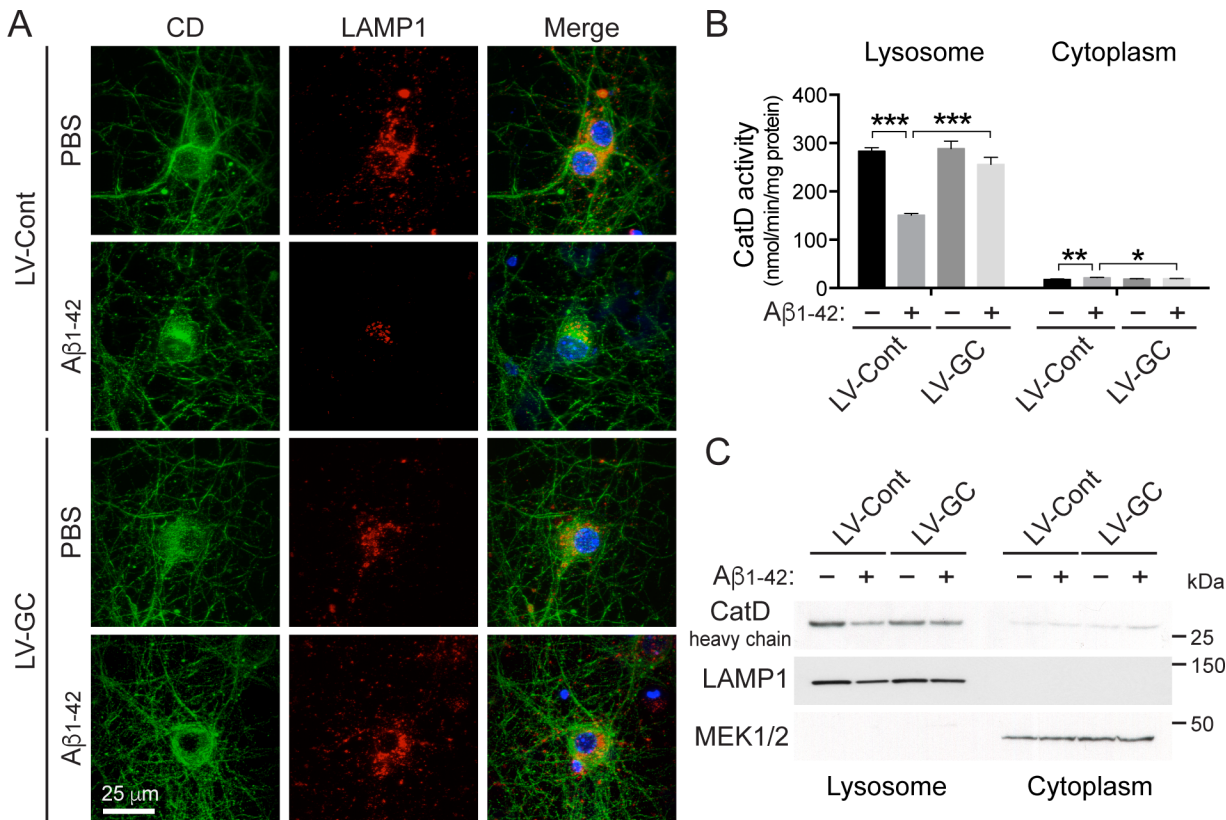

**Fig 6. Ectopic expression of GCCase restores lysosomal cathepsin D activity reduced by Aβ<sub>1-42</sub> oligomer treatment in primary neurons.** (A) The localization of cathepsin D is represented using lysosomal marker (LAMP1) and DAPI. (B) The cathepsin D activity levels were measured in lysosome-enriched and cytoplasmic fractions of lenti-control (LV-Cont, n = 3) or lenti-GCCase (LV-GC, n = 3) virus infected primary mouse cortical neurons treated with PBS or 1 μM oligomeric Aβ<sub>1-42</sub> for 24 h at 10 days *in vitro*. (C) Immunoblot analysis for heavy chain subunit of mature cathepsin D (CatD heavy chain) in cytoplasmic and lysosome-enriched fractions was performed using anti-cathepsin D antibody. The quality of cytosolic and lysosome-enriched fractions was confirmed with immunoblotting using anti-MEK1/2 and LAMP1 antibodies, respectively. The values are the mean ± SEM of three independent experiments (two-way ANOVA, Bonferroni posttest, \*P < 0.05, \*\*P < 0.01, \*\*\*P < 0.001).

doi:10.1371/journal.pone.0143854.g006

of lysosomes, impaired acidification of cellular compartments, and reduced lysosomal cathepsin D activity.

## Discussion

Despite the growing evidence implicating GCCase in neurodegenerative disorders such as PD, DLB, and GD, very little research has explored the relationship of GCCase protein levels and enzyme activity to AD pathology except for the finding from Xu and colleagues suggesting that aggregates of Aβ and amyloid precursor protein (APP) are increased in GD mice, raising the possibility that GCCase deficiency contributes to AD [41]. In this study, we have demonstrated that considerably lowered GCCase protein levels and enzyme activity were observed in the hippocampus of sporadic AD patients and following Aβ<sub>1-42</sub> oligomer treatment of hippocampal and cortical neurons suggesting that the deficiency of GCCase may play a role in AD progression. Importantly, overexpression of GCCase yields beneficial protective effects against Aβ<sub>1-42</sub> oligomer-induced neurotoxicity through facilitating Aβ<sub>1-42</sub> oligomer degradation by restoring lysosomal activity. It will be interesting to determine whether GCCase protein levels and enzyme activity are altered similarly in other brain regions affected by AD and whether diminished GCCase levels inversely correlate with Aβ accumulation. Also of interest is the development of

AD animal models with increased wild type GCase enzyme activity, perhaps through *GBA1* gene therapy or pharmacological chaperones. Such a system could potentially determine if the same neuroprotective effects observed in this work could be replicated in an animal system. Further studies like these will enhance our understanding of the GCase-associated lysosomal pathways involved in AD.

A number of possible mechanisms have been suggested for  $A\beta_{1-42}$ -induced neurotoxicity, but the exact mechanism by which  $A\beta_{1-42}$  leads to synaptic dysfunction and neuronal death is still controversial. One possible explanation is that lysosomal membrane permeabilization (LMP) may be involved in  $A\beta$  neurotoxicity. Neurons treated with  $A\beta_{1-42}$  results in neuronal toxicity accompanied by a loss of lysosomal acidification and membrane integrity, which are indicators of LMP [40, 42, 43]. Consistent with prior studies, we confirmed that  $A\beta_{1-42}$  oligomer treatment in primary neurons leads to increased intracellular acidification, alterations in lysosome number and size, and impaired cathepsin D activity, suggesting that LMP may be involved in  $A\beta$  toxicity. Importantly, the expression of GCase restores the  $A\beta_{1-42}$  oligomer-induced LMP, implying that GCase deficiency is required for  $A\beta_{1-42}$  oligomer-induced LMP. Many pathogenic factors in neurodegenerative disorders could contribute to LMP [40, 44]. Among them, normal membrane lipid composition is necessary for lysosomal stability, whereas an imbalance in lipid levels promotes LMP [44, 45]. GCase deficiency may contribute to changes in lipid membrane composition by hampering the hydrolysis of glucosylceramide and glucosylsphingosine, which are substrates for GCase and a major source of lipids. Further studies are required to elucidate the exact mechanism by which GCase regulates LMP.

While not explored, there may be another possible mechanism in which GCase regulates  $A\beta_{1-42}$  oligomer levels. Interestingly, there is still a reduction in  $A\beta_{1-42}$  oligomer levels in neurons expressing GCase with the treatment of lysosomal inhibitors (Fig 3A). This suggests that GCase promotes degradation of  $A\beta_{1-42}$  oligomers not only through autophagy-lysosome pathway but also through other protein turnover regulation pathways, such as ubiquitin-proteasome pathway (UPS) [46] and transport mechanisms including endocytosis and exocytosis [47]. Further studies are needed to elucidate whether GCase facilitates UPS to degrade  $A\beta_{1-42}$  oligomers or mediates endocytosis and exocytosis of  $A\beta_{1-42}$  oligomers.

While our data indicate that GCase protein levels were decreased in brains with AD or  $A\beta_{1-42}$  oligomer-treated AD hippocampal or cortical neurons, there is no evidence elucidating the mechanism by which the GCase protein levels are regulated. One possible scenario is that  $A\beta_{1-42}$  oligomers could regulate GCase protein levels through reducing the mRNA levels via an unknown transcription factor. Since *GBA1* mRNA are controlled by transcription factor EB (TFEB) [18, 48], it is possible that  $A\beta_{1-42}$  oligomers could prevent TFEB nucleus localization thereby reducing *GBA1* mRNA transcription and thus decreasing GCase protein levels. However, it is unlikely that the reduction in GCase protein levels is due to a transcriptional effect since we found no difference in the levels of *GBA1* mRNA in AD hippocampus versus the controls. On the other hand, another possibility for the reduced GCase protein levels is impairment in the quality control of the UPS in AD brains and  $A\beta_{1-42}$  oligomer-treated primary neurons. It has recently been demonstrated that numerous E3 ligases, such as parkin, Itch, and c-Abl, regulate the stability of mutant *GBA1*, despite the fact wild-type *GBA1* is not subject to an interaction with the latter E3 ligases [49–51]. The Hsp-90/Hop/cdc39/hsp-27 complex and ERdj3 are also involved in controlling mutant *GBA1* stability via the endoplasmic reticulum-associated degradation (ERAD) system [52–54]. The identification of the E3 ligase involved in the ubiquitin proteasome degradation pathway for wild-type GCase proteins awaits investigation.

It has been suggested that cell-to-cell spreading of amyloid proteins is associated with the pathological progression of various neurodegenerative disorders, including PD and AD [1, 25,

[55]. Lysosomal activity is required for degradation of internalized amyloid proteins, and its activity is an important parameter in determining the rate of cell-to-cell amyloid protein spreading [56]. Lee *et al.*, has demonstrated that lysosomal dysfunction due to the GCase deficiency facilitates cell-to-cell spreading of  $\alpha$ -synuclein aggregates and PD pathological propagation [25]. This leads us to speculate that lysosomal impairment due to diminished GCase expression and enzyme activity as shown in AD could also affect cell-to-cell transmission of A $\beta$  aggregates and the pathoprogession of AD [57]. It would be interesting to determine if GCase plays a role in the propagation of A $\beta$  aggregates in sporadic AD.

In this study, we demonstrate that GCase expression and enzyme activity in the brain of AD patients is lowered and that this deficiency could play a role in the development of AD by inducing lysosomal dysfunction. In addition, we demonstrate that GCase facilitates the clearance of A $\beta$ <sub>1–42</sub> oligomers and protects against A $\beta$ <sub>1–42</sub> oligomer-induced neuronal cell death by enhancing lysosomal function. Altogether, our findings indicate that enhancing lysosomal function via GCase could be a disease-modifying therapy and that restoring GCase enzyme activity through pharmacological chaperones might inhibit the pathoprogession of AD.

## Supporting Information

**S1 Fig.  $\beta$ -galactosidase activity and GCase glycosylation in sporadic AD brain.** (A)  $\beta$ -galactosidase activity was measured using lysosome-enriched fractions prepared from the control or AD hippocampus (each group, n = 6). The  $\beta$ -galactosidase activity was quantified and normalized to the control. (Student's t test, \**P* < 0.05) (B) The glycosylation state of GCase in the AD and control hippocampus was analyzed by immunoblotting with Endo H treatment. (TIF)

**S2 Fig. Overexpression of GCase restores impairment of lysosomal biogenesis induced by A $\beta$ <sub>1–42</sub> oligomers in neurons.** (A) Primary mouse cortical neurons were infected with lenti-control (LV-Cont, n = 3) or lenti-GCase (LV-GC, n = 3) virus at 7 days *in vitro*. After treatment with PBS or 1  $\mu$ M oligomeric A $\beta$ <sub>1–42</sub> for 24 h at 10 days *in vitro*, the neurons were immunostained with anti-MAP2 (neuronal marker, purple) and anti-LAMP1 antibodies (lysosomal marker, red). (TIF)

**S1 Table. Human post-mortem tissues used in Fig 1 and S1B Fig.** Abbreviations: AD, Alzheimer's disease; PMD, post-mortem delay; N/A, not available. Case# 5, 12, 2282, and 2417 were used for the Endo-H resistance assay in S1B Fig. (PDF)

## Acknowledgments

T.M.D. is the Leonard and Madlyn Abramson Professor in Neurodegenerative Diseases. The authors acknowledge the joint participation by the Diana Helis Henry Medical Research Foundation through its direct engagement in the continuous active conduct of medical research in conjunction with The Johns Hopkins Hospital and the Johns Hopkins University School of Medicine and the Foundation's Parkinson's Disease Program No. H-2013.

This work was supported by grants from the NIH/NINDS NS38377 Morris K. Udall Parkinson's Disease Foundation and NS082205.

The authors wish to thank Jennifer Rosheck who assisted in the proofreading of the manuscript.

## Author Contributions

Conceived and designed the experiments: SC DK HSK. Performed the experiments: SC DK TIK HP SY SK HH HSK. Analyzed the data: SC DK TIK HP SY SK HH HSK. Contributed reagents/materials/analysis tools: OP JCT VLD TMD. Wrote the paper: SC DK HSK.

## References

1. Brettschneider J, Del Tredici K, Lee VM, Trojanowski JQ. Spreading of pathology in neurodegenerative diseases: a focus on human studies. *Nature reviews Neuroscience*. 2015; 16(2):109–20. doi: [10.1038/nrn3887](https://doi.org/10.1038/nrn3887) PMID: [25588378](https://pubmed.ncbi.nlm.nih.gov/25588378/)
2. Forman MS, Trojanowski JQ, Lee VM. Neurodegenerative diseases: a decade of discoveries paves the way for therapeutic breakthroughs. *Nature medicine*. 2004; 10(10):1055–63. PMID: [15459709](https://pubmed.ncbi.nlm.nih.gov/15459709/)
3. LaFerla FM, Green KN, Oddo S. Intracellular amyloid-beta in Alzheimer's disease. *Nature reviews Neuroscience*. 2007; 8(7):499–509. PMID: [17551515](https://pubmed.ncbi.nlm.nih.gov/17551515/)
4. Selkoe DJ. Clearing the brain's amyloid cobwebs. *Neuron*. 2001; 32(2):177–80. PMID: [11683988](https://pubmed.ncbi.nlm.nih.gov/11683988/)
5. Watson D, Castano E, Kokjohn TA, Kuo YM, Lyubchenko Y, Pinsky D, et al. Physicochemical characteristics of soluble oligomeric A $\beta$  and their pathologic role in Alzheimer's disease. *Neurological research*. 2005; 27(8):869–81. PMID: [16354549](https://pubmed.ncbi.nlm.nih.gov/16354549/)
6. Small DH, Mok SS, Bornstein JC. Alzheimer's disease and A $\beta$  toxicity: from top to bottom. *Nature reviews Neuroscience*. 2001; 2(8):595–8. PMID: [11484003](https://pubmed.ncbi.nlm.nih.gov/11484003/)
7. Nixon RA. Autophagy, amyloidogenesis and Alzheimer disease. *Journal of cell science*. 2007; 120(Pt 23):4081–91. PMID: [18032783](https://pubmed.ncbi.nlm.nih.gov/18032783/)
8. Orr ME, Oddo S. Autophagic/lysosomal dysfunction in Alzheimer's disease. *Alzheimer's research & therapy*. 2013; 5(5):53.
9. Wong E, Cuervo AM. Autophagy gone awry in neurodegenerative diseases. *Nature neuroscience*. 2010; 13(7):805–11. doi: [10.1038/nn.2575](https://doi.org/10.1038/nn.2575) PMID: [20581817](https://pubmed.ncbi.nlm.nih.gov/20581817/)
10. Rubinsztein DC, Gestwicki JE, Murphy LO, Klionsky DJ. Potential therapeutic applications of autophagy. *Nature reviews Drug discovery*. 2007; 6(4):304–12. PMID: [17396135](https://pubmed.ncbi.nlm.nih.gov/17396135/)
11. Beutler E. Gaucher's disease. *The New England journal of medicine*. 1991; 325(19):1354–60. PMID: [1922238](https://pubmed.ncbi.nlm.nih.gov/1922238/)
12. Grabowski GA. Treatment of Gaucher's disease. *The New England journal of medicine*. 1993; 328(21):1565.
13. Sidransky E, Nalls MA, Aasly JO, Aharon-Peretz J, Annesi G, Barbosa ER, et al. Multicenter analysis of glucocerebrosidase mutations in Parkinson's disease. *The New England journal of medicine*. 2009; 361(17):1651–61. doi: [10.1056/NEJMoa0901281](https://doi.org/10.1056/NEJMoa0901281) PMID: [19846850](https://pubmed.ncbi.nlm.nih.gov/19846850/)
14. Swan M, Saunders-Pullman R. The association between ss-glucocerebrosidase mutations and parkinsonism. *Current neurology and neuroscience reports*. 2013; 13(8):368. doi: [10.1007/s11910-013-0368-x](https://doi.org/10.1007/s11910-013-0368-x) PMID: [23812893](https://pubmed.ncbi.nlm.nih.gov/23812893/)
15. Sidransky E, Lopez G. The link between the GBA gene and parkinsonism. *The Lancet Neurology*. 2012; 11(11):986–98. doi: [10.1016/S1474-4422\(12\)70190-4](https://doi.org/10.1016/S1474-4422(12)70190-4) PMID: [23079555](https://pubmed.ncbi.nlm.nih.gov/23079555/)
16. Nalls MA, Duran R, Lopez G, Kurzawa-Akanbi M, McKeith IG, Chinnery PF, et al. A multicenter study of glucocerebrosidase mutations in dementia with Lewy bodies. *JAMA neurology*. 2013; 70(6):727–35. doi: [10.1001/jamaneurol.2013.1925](https://doi.org/10.1001/jamaneurol.2013.1925) PMID: [23588557](https://pubmed.ncbi.nlm.nih.gov/23588557/)
17. Goker-Alpan O, Stubblefield BK, Giasson BI, Sidransky E. Glucocerebrosidase is present in alpha-synuclein inclusions in Lewy body disorders. *Acta neuropathologica*. 2010; 120(5):641–9. doi: [10.1007/s00401-010-0741-7](https://doi.org/10.1007/s00401-010-0741-7) PMID: [20838799](https://pubmed.ncbi.nlm.nih.gov/20838799/)
18. Siebert M, Sidransky E, Westbroek W. Glucocerebrosidase is shaking up the synucleinopathies. *Brain: a journal of neurology*. 2014; 137(Pt 5):1304–22.
19. Mazzulli JR, Xu YH, Sun Y, Knight AL, McLean PJ, Caldwell GA, et al. Gaucher disease glucocerebrosidase and alpha-synuclein form a bidirectional pathogenic loop in synucleinopathies. *Cell*. 2011; 146(1):37–52. doi: [10.1016/j.cell.2011.06.001](https://doi.org/10.1016/j.cell.2011.06.001) PMID: [21700325](https://pubmed.ncbi.nlm.nih.gov/21700325/)
20. Woodard CM, Campos BA, Kuo SH, Nirenberg MJ, Nestor MW, Zimmer M, et al. iPSC-derived dopamine neurons reveal differences between monozygotic twins discordant for Parkinson's disease. *Cell reports*. 2014; 9(4):1173–82. doi: [10.1016/j.celrep.2014.10.023](https://doi.org/10.1016/j.celrep.2014.10.023) PMID: [25456120](https://pubmed.ncbi.nlm.nih.gov/25456120/)
21. Schondorf DC, Aureli M, McAllister FE, Hindley CJ, Mayer F, Schmid B, et al. iPSC-derived neurons from GBA1-associated Parkinson's disease patients show autophagic defects and impaired calcium homeostasis. *Nature communications*. 2014; 5:4028. doi: [10.1038/ncomms5028](https://doi.org/10.1038/ncomms5028) PMID: [24905578](https://pubmed.ncbi.nlm.nih.gov/24905578/)



22. Gegg ME, Burke D, Heales SJ, Cooper JM, Hardy J, Wood NW, et al. Glucocerebrosidase deficiency in substantia nigra of parkinson disease brains. *Annals of neurology*. 2012; 72(3):455–63. doi: [10.1002/ana.23614](https://doi.org/10.1002/ana.23614) PMID: [23034917](https://pubmed.ncbi.nlm.nih.gov/23034917/)
23. Murphy KE, Gysbers AM, Abbott SK, Tayebi N, Kim WS, Sidransky E, et al. Reduced glucocerebrosidase is associated with increased alpha-synuclein in sporadic Parkinson's disease. *Brain: a journal of neurology*. 2014; 137(Pt 3):834–48.
24. Murphy KE, Halliday GM. Glucocerebrosidase deficits in sporadic Parkinson disease. *Autophagy*. 2014; 10(7):1350–1. doi: [10.4161/auto.29074](https://doi.org/10.4161/auto.29074) PMID: [24915553](https://pubmed.ncbi.nlm.nih.gov/24915553/)
25. Bae EJ, Yang NY, Song M, Lee CS, Lee JS, Jung BC, et al. Glucocerebrosidase depletion enhances cell-to-cell transmission of alpha-synuclein. *Nature communications*. 2014; 5:4755. doi: [10.1038/ncomms5755](https://doi.org/10.1038/ncomms5755) PMID: [25156829](https://pubmed.ncbi.nlm.nih.gov/25156829/)
26. Richter F, Fleming SM, Watson M, Lemesre V, Pellegrino L, Raney B, et al. A GCase chaperone improves motor function in a mouse model of synucleinopathy. *Neurotherapeutics: the journal of the American Society for Experimental NeuroTherapeutics*. 2014; 11(4):840–56.
27. Sardi SP, Clarke J, Kinnecom C, Tamsett TJ, Li L, Stanek LM, et al. CNS expression of glucocerebrosidase corrects alpha-synuclein pathology and memory in a mouse model of Gaucher-related synucleinopathy. *Proceedings of the National Academy of Sciences of the United States of America*. 2011; 108(29):12101–6. doi: [10.1073/pnas.1108197108](https://doi.org/10.1073/pnas.1108197108) PMID: [21730160](https://pubmed.ncbi.nlm.nih.gov/21730160/)
28. Kam TI, Song S, Gwon Y, Park H, Yan JJ, Im I, et al. FcgammaRIIb mediates amyloid-beta neurotoxicity and memory impairment in Alzheimer's disease. *The Journal of clinical investigation*. 2013; 123(7):2791–802. doi: [10.1172/JCI66827](https://doi.org/10.1172/JCI66827) PMID: [23921129](https://pubmed.ncbi.nlm.nih.gov/23921129/)
29. Ko HS, Bailey R, Smith WW, Liu Z, Shin JH, Lee YI, et al. CHIP regulates leucine-rich repeat kinase-2 ubiquitination, degradation, and toxicity. *Proceedings of the National Academy of Sciences of the United States of America*. 2009; 106(8):2897–902. doi: [10.1073/pnas.0810123106](https://doi.org/10.1073/pnas.0810123106) PMID: [19196961](https://pubmed.ncbi.nlm.nih.gov/19196961/)
30. Wang Y, Kim NS, Haince JF, Kang HC, David KK, Andrabi SA, et al. Poly(ADP-ribose) (PAR) binding to apoptosis-inducing factor is critical for PAR polymerase-1-dependent cell death (parthanatos). *Science signaling*. 2011; 4(167):ra20. doi: [10.1126/scisignal.2000902](https://doi.org/10.1126/scisignal.2000902) PMID: [21467298](https://pubmed.ncbi.nlm.nih.gov/21467298/)
31. Ko HS, von Coelln R, Sriram SR, Kim SW, Chung KK, Pletnikova O, et al. Accumulation of the authentic parkin substrate aminoacyl-tRNA synthetase cofactor, p38/JTV-1, leads to catecholaminergic cell death. *The Journal of neuroscience: the official journal of the Society for Neuroscience*. 2005; 25(35):7968–78.
32. Ko HS, Lee Y, Shin JH, Karuppagounder SS, Gadad BS, Koleske AJ, et al. Phosphorylation by the c-Abl protein tyrosine kinase inhibits parkin's ubiquitination and protective function. *Proceedings of the National Academy of Sciences of the United States of America*. 2010; 107(38):16691–6. doi: [10.1073/pnas.1006083107](https://doi.org/10.1073/pnas.1006083107) PMID: [20823226](https://pubmed.ncbi.nlm.nih.gov/20823226/)
33. Marshall J, McEachern KA, Kyros JA, Nietupski JB, Budzinski T, Ziegler RJ, et al. Demonstration of feasibility of in vivo gene therapy for Gaucher disease using a chemically induced mouse model. *Molecular therapy: the journal of the American Society of Gene Therapy*. 2002; 6(2):179–89.
34. Livak KJ, Schmittgen TD. Analysis of relative gene expression data using real-time quantitative PCR and the 2(-Delta Delta C(T)) Method. *Methods*. 2001; 25(4):402–8. PMID: [11846609](https://pubmed.ncbi.nlm.nih.gov/11846609/)
35. Haass C, Selkoe DJ. Soluble protein oligomers in neurodegeneration: lessons from the Alzheimer's amyloid beta-peptide. *Nature reviews Molecular cell biology*. 2007; 8(2):101–12. PMID: [17245412](https://pubmed.ncbi.nlm.nih.gov/17245412/)
36. Sakono M, Zako T. Amyloid oligomers: formation and toxicity of Abeta oligomers. *The FEBS journal*. 2010; 277(6):1348–58. doi: [10.1111/j.1742-4658.2010.07568.x](https://doi.org/10.1111/j.1742-4658.2010.07568.x) PMID: [20148964](https://pubmed.ncbi.nlm.nih.gov/20148964/)
37. Soura V, Stewart-Parker M, Williams TL, Ratnayaka A, Atherton J, Gorringer K, et al. Visualization of co-localization in Abeta42-administered neuroblastoma cells reveals lysosome damage and autophagosome accumulation related to cell death. *The Biochemical journal*. 2012; 441(2):579–90. doi: [10.1042/BJ20110749](https://doi.org/10.1042/BJ20110749) PMID: [21955321](https://pubmed.ncbi.nlm.nih.gov/21955321/)
38. Yang AJ, Chandswangbhuvana D, Margol L, Glabe CG. Loss of endosomal/lysosomal membrane impermeability is an early event in amyloid Abeta1-42 pathogenesis. *Journal of neuroscience research*. 1998; 52(6):691–8. PMID: [9669318](https://pubmed.ncbi.nlm.nih.gov/9669318/)
39. Nilsson C, Johansson U, Johansson AC, Kagedal K, Ollinger K. Cytosolic acidification and lysosomal alkalization during TNF-alpha induced apoptosis in U937 cells. *Apoptosis: an international journal on programmed cell death*. 2006; 11(7):1149–59.
40. Boya P, Kroemer G. Lysosomal membrane permeabilization in cell death. *Oncogene*. 2008; 27(50):6434–51. doi: [10.1038/onc.2008.310](https://doi.org/10.1038/onc.2008.310) PMID: [18955971](https://pubmed.ncbi.nlm.nih.gov/18955971/)
41. Xu YH, Xu K, Sun Y, Liou B, Quinn B, Li RH, et al. Multiple pathogenic proteins implicated in neuronopathic Gaucher disease mice. *Hum Mol Genet*. 2014; 23(15):3943–57. doi: [10.1093/hmg/ddu105](https://doi.org/10.1093/hmg/ddu105) PMID: [24599400](https://pubmed.ncbi.nlm.nih.gov/24599400/)

42. Ditaranto K, Tekirian TL, Yang AJ. Lysosomal membrane damage in soluble Aβ-mediated cell death in Alzheimer's disease. *Neurobiology of disease*. 2001; 8(1):19–31. PMID: [11162237](#)
43. Liu RQ, Zhou QH, Ji SR, Zhou Q, Feng D, Wu Y, et al. Membrane localization of beta-amyloid 1–42 in lysosomes: a possible mechanism for lysosome labilization. *The Journal of biological chemistry*. 2010; 285(26):19986–96. doi: [10.1074/jbc.M109.036798](#) PMID: [20430896](#)
44. Appelqvist H, Waster P, Kagedal K, Ollinger K. The lysosome: from waste bag to potential therapeutic target. *Journal of molecular cell biology*. 2013; 5(4):214–26. doi: [10.1093/jmcb/mjt022](#) PMID: [23918283](#)
45. Kagedal K, Zhao M, Svensson I, Brunk UT. Sphingosine-induced apoptosis is dependent on lysosomal proteases. *The Biochemical journal*. 2001; 359(Pt 2):335–43. PMID: [11583579](#)
46. de Vrij FM, Fischer DF, van Leeuwen FW, Hol EM. Protein quality control in Alzheimer's disease by the ubiquitin proteasome system. *Prog Neurobiol*. 2004; 74(5):249–70. PMID: [15582222](#)
47. Nath S, Agholme L, Kurudenkandy FR, Granseth B, Marcusson J, Hallbeck M. Spreading of neurodegenerative pathology via neuron-to-neuron transmission of β-amyloid. *J Neurosci*. 2012; 32(26):8767–77 doi: [10.1523/JNEUROSCI.0615-12.2012](#) PMID: [22745479](#)
48. Sardiello M, Palmieri M, di Ronza A, Medina DL, Valenza M, Gennarino VA, et al. A gene network regulating lysosomal biogenesis and function. *Science*. 2009; 325(5939):473–7. doi: [10.1126/science.1174447](#) PMID: [19556463](#)
49. Ron I, Rapaport D, Horowitz M. Interaction between parkin and mutant glucocerebrosidase variants: a possible link between Parkinson disease and Gaucher disease. *Hum Mol Genet*. 2010; 19(19):3771–81. doi: [10.1093/hmg/ddq292](#) PMID: [20643691](#)
50. Maor G, Filocamo M, Horowitz M. ITCH regulates degradation of mutant glucocerebrosidase: implications to Gaucher disease. *Hum Mol Genet*. 2013; 22(7):1316–27. doi: [10.1093/hmg/ddt535](#) PMID: [23255161](#)
51. Lu J, Chiang J, Iyer RR, Thompson E, Kaneski CR, Xu DS, et al. Decreased glucocerebrosidase activity in Gaucher disease parallels quantitative enzyme loss due to abnormal interaction with TCP1 and c-Cbl. *Proceedings of the National Academy of Sciences of the United States of America*. 2010; 107(50):21665–70. doi: [10.1073/pnas.1014376107](#) PMID: [21098288](#)
52. Lu J, Yang C, Chen M, Ye DY, Lonser RR, Brady RO, et al. Histone deacetylase inhibitors prevent the degradation and restore the activity of glucocerebrosidase in Gaucher disease. *Proceedings of the National Academy of Sciences of the United States of America*. 2011; 108(52):21200–5. doi: [10.1073/pnas.1119181109](#) PMID: [22160715](#)
53. Tan YL, Genreux JC, Pankow S, Aerts JM, Yates JR 3rd, Kelly JW. ERdj3 is an endoplasmic reticulum degradation factor for mutant glucocerebrosidase variants linked to Gaucher's disease. *Chemistry & biology*. 2014; 21(8):967–76.
54. Yang C, Rahimpour S, Lu J, Pacak K, Ikejiri B, Brady RO, et al. Histone deacetylase inhibitors increase glucocerebrosidase activity in Gaucher disease by modulation of molecular chaperones. *Proceedings of the National Academy of Sciences of the United States of America*. 2013; 110(3):966–71. doi: [10.1073/pnas.1221046110](#) PMID: [23277556](#)
55. Irwin DJ, Lee VM, Trojanowski JQ. Parkinson's disease dementia: convergence of alpha-synuclein, tau and amyloid-beta pathologies. *Nature reviews Neuroscience*. 2013; 14(9):626–36. doi: [10.1038/nrn3549](#) PMID: [23900411](#)
56. Desplats P, Lee HJ, Bae EJ, Patrick C, Rockenstein E, Crews L, et al. Inclusion formation and neuronal cell death through neuron-to-neuron transmission of alpha-synuclein. *Proceedings of the National Academy of Sciences of the United States of America*. 2009; 106(31):13010–5. doi: [10.1073/pnas.0903691106](#) PMID: [19651612](#)
57. Lee SJ, Lim HS, Masliah E, Lee HJ. Protein aggregate spreading in neurodegenerative diseases: problems and perspectives. *Neuroscience research*. 2011; 70(4):339–48. doi: [10.1016/j.neures.2011.05.008](#) PMID: [21624403](#)
